# Supplementary material
Source: publisher figshare collection journal article supplement (https://karger.figshare.com/ndownloader/files/10218996)
Supplement: Supplementary file 1 [file 10218996]

## Sheet: Supplementary Table 1
Supplementary table 1. Molecular reactions retrieved from Reactome database
Pathway identifier	Pathway name	#Entities found	#Entities total	#Interactors found	#Interactors total	Entities ratio	Entities pValue	Entities FDR	#Reactions found	#Reactions total	Reactions ratio	Species identifier	Species name	Submitted entities found	Mapped entities	Submitted entities hit interactor	Interacts with	Found reaction identifiers
R-HSA-3371568	Attenuation phase	9	47	0	0	0.00360429	1.88738e-15	5.45453e-13	4	5	0.000489285	9606	Homo sapiens	FKBP4;HSPA1A				R-HSA-3371554;R-HSA-5324617;R-HSA-5082369;R-HSA-5082384
R-HSA-3371571	HSF1-dependent transactivation	9	59	0	0	0.00452454	1.46549e-14	2.11031e-12	5	8	0.000782855	9606	Homo sapiens	FKBP4;HSPA1A				R-HSA-3371554;R-HSA-5324617;R-HSA-5082356;R-HSA-5082369;R-HSA-5082384
R-HSA-3371556	Cellular response to heat stress	10	133	0	126	0.0101994	1.82111e-10	1.74827e-08	15	29	0.00283785	9606	Homo sapiens	YWHAE;FKBP4;HSPA1A				R-HSA-5251955;R-HSA-5251959;R-HSA-5082369;R-HSA-4793925;R-HSA-3371518;R-HSA-3371554;R-HSA-4793819;R-HSA-3371527;R-HSA-5251942;R-HSA-5324617;R-HSA-3371467;R-HSA-5082356;R-HSA-5252041;R-HSA-5082384;R-HSA-5252079
R-HSA-3371511	HSF1 activation	7	43	0	33	0.00329755	3.78634e-10	2.72617e-08	2	7	0.000684999	9606	Homo sapiens	YWHAE;FKBP4;HSPA1A				R-HSA-4793819;R-HSA-3371527
R-HSA-3371453	Regulation of HSF1-mediated heat shock response	9	111	0	111	0.00851227	1.24306e-09	7.08547e-08	8	14	0.00137	9606	Homo sapiens	YWHAE;FKBP4;HSPA1A				R-HSA-5251955;R-HSA-5251942;R-HSA-5251959;R-HSA-3371467;R-HSA-5252041;R-HSA-4793925;R-HSA-3371518;R-HSA-5252079
R-HSA-2262752	Cellular responses to stress	10	525	0	681	0.0402607	0.000159815	0.00767111	15	207	0.0202564	9606	Homo sapiens	YWHAE;FKBP4;HSPA1A				R-HSA-5251955;R-HSA-5251959;R-HSA-5082369;R-HSA-4793925;R-HSA-3371518;R-HSA-3371554;R-HSA-4793819;R-HSA-3371527;R-HSA-5251942;R-HSA-5324617;R-HSA-3371467;R-HSA-5082356;R-HSA-5252041;R-HSA-5082384;R-HSA-5252079
R-HSA-2993913	Clearance of Nuclear Envelope Membranes from Chromatin	2	12	0	0	0.000920245	0.000366088	0.0150096	1	1	9.78569e-05	9606	Homo sapiens	LMNA				R-HSA-2993898
R-HSA-2995410	Nuclear Envelope Reassembly	2	16	0	2	0.00122699	0.000729394	0.0233406	1	3	0.000293571	9606	Homo sapiens	LMNA				R-HSA-2995376
R-HSA-2995383	Initiation of Nuclear Envelope Reformation	2	16	0	2	0.00122699	0.000729394	0.0233406	1	3	0.000293571	9606	Homo sapiens	LMNA				R-HSA-2995376
R-HSA-4419969	Depolymerisation of the Nuclear Lamina	2	23	0	0	0.0017638	0.00132353	0.0370587	2	6	0.000587142	9606	Homo sapiens	LMNA				R-HSA-5229194;R-HSA-5244669
R-HSA-389957	Prefoldin mediated transfer of substrate to CCT/TriC	2	28	0	0	0.00214724	0.00194733	0.050061	1	2	0.000195714	9606	Homo sapiens	TCP1;CCT8				R-HSA-389970
R-HSA-389960	Formation of tubulin folding intermediates by CCT/TriC	2	29	0	0	0.00222393	0.00208588	0.050061	2	2	0.000195714	9606	Homo sapiens	TCP1;CCT8				R-HSA-389954;R-HSA-389961
R-HSA-390450	Folding of actin by CCT/TriC	2	13	0	29	0.000996933	0.00409734	0.0898757	2	2	0.000195714	9606	Homo sapiens	TCP1;CCT8				R-HSA-390453;R-HSA-390459
R-HSA-390471	Association of TriC/CCT with target proteins during biosynthesis	2	40	0	3	0.00306748	0.00449378	0.0898757	2	2	0.000195714	9606	Homo sapiens	TCP1;CCT8				R-HSA-390470;R-HSA-391266
R-HSA-6814122	Cooperation of PDCL (PhLP1) and TRiC/CCT in G-protein beta folding	2	45	0	3	0.00345092	0.00533771	0.101417	8	11	0.00107643	9606	Homo sapiens	TCP1;CCT8				R-HSA-6814119;R-HSA-8850534;R-HSA-8850529;R-HSA-8850527;R-HSA-6814124;R-HSA-8850539;R-HSA-6814121;R-HSA-6814120
R-HSA-70171	Glycolysis	2	59	0	0	0.00452454	0.00826654	0.143365	1	12	0.00117428	9606	Homo sapiens	ENO1				R-HSA-71660
R-HSA-5619110	Defective SLCO1B1 causes hyperbilirubinemia, Rotor type (HBLRR)	1	4	0	0	0.000306748	0.00917641	0.143365	1	1	9.78569e-05	9606	Homo sapiens	ALB				R-HSA-5661184
R-HSA-5619058	Defective SLCO1B3 causes hyperbilirubinemia, Rotor type (HBLRR)	1	4	0	0	0.000306748	0.00917641	0.143365	1	1	9.78569e-05	9606	Homo sapiens	ALB				R-HSA-5661198
R-HSA-389958	Cooperation of Prefoldin and TriC/CCT in actin and tubulin folding	2	36	0	29	0.00276074	0.009657	0.143365	5	6	0.000587142	9606	Homo sapiens	TCP1;CCT8				R-HSA-390453;R-HSA-389970;R-HSA-389954;R-HSA-389961;R-HSA-390459
R-HSA-6803529	FGFR2 alternative splicing	2	29	0	40	0.00222393	0.0102404	0.143365	3	4	0.000391428	9606	Homo sapiens	HNRNPH1				R-HSA-6803527;R-HSA-6803838;R-HSA-6803836
R-HSA-5617833	Cilium Assembly	4	207	0	241	0.0158742	0.0112812	0.146656	9	50	0.00489285	9606	Homo sapiens	YWHAE;TCP1;ALB;CCT8				R-HSA-5626228;R-HSA-5626227;R-HSA-5624125;R-HSA-5626220;R-HSA-5626223;R-HSA-5626681;R-HSA-5617816;R-HSA-5626699;R-HSA-5638009
R-HSA-70263	Gluconeogenesis	2	65	0	10	0.00498466	0.013053	0.169689	1	21	0.002055	9606	Homo sapiens	ENO1				R-HSA-70494
R-HSA-5620922	BBSome-mediated cargo-targeting to cilium	2	24	0	72	0.00184049	0.0147448	0.176937	1	5	0.000489285	9606	Homo sapiens	TCP1;CCT8				R-HSA-5624125
R-HSA-2980766	Nuclear Envelope Breakdown	2	63	0	41	0.00483129	0.0236463	0.265918	3	13	0.00127214	9606	Homo sapiens	LMNA				R-HSA-5229194;R-HSA-2993898;R-HSA-5244669
R-HSA-6798695	Neutrophil degranulation	4	480	0	0	0.0368098	0.0241743	0.265918	3	10	0.000978569	9606	Homo sapiens	ANXA2;CCT8;HSPA1A				R-HSA-6800434;R-HSA-6798751;R-HSA-6798748
R-HSA-352238	Breakdown of the nuclear lamina	1	3	0	8	0.000230061	0.0250381	0.271486	1	2	0.000195714	9606	Homo sapiens	LMNA				R-HSA-264865
R-HSA-445355	Smooth Muscle Contraction	2	37	0	74	0.00283742	0.0271486	0.271486	1	9	0.000880712	9606	Homo sapiens	ANXA1;ANXA2				R-HSA-5263628
R-HSA-444473	Formyl peptide receptors bind formyl peptides and many other ligands	1	11	0	2	0.000843558	0.0295244	0.295244	2	3	0.000293571	9606	Homo sapiens	ANXA1				R-HSA-444476;R-HSA-391913
R-HSA-5620920	Cargo trafficking to the periciliary membrane	2	55	0	90	0.00421779	0.0332548	0.299293	1	27	0.00264214	9606	Homo sapiens	TCP1;CCT8				R-HSA-5624125
R-HSA-390466	Chaperonin-mediated protein folding	2	99	0	35	0.00759202	0.0372553	0.316569	15	19	0.00185928	9606	Homo sapiens	TCP1;CCT8				R-HSA-6814119;R-HSA-8850534;R-HSA-390470;R-HSA-8850529;R-HSA-391266;R-HSA-389954;R-HSA-6814124;R-HSA-389961;R-HSA-8850539;R-HSA-6814121;R-HSA-6814120;R-HSA-390453;R-HSA-389970;R-HSA-8850527;R-HSA-390459
R-HSA-2408517	SeMet incorporation into proteins	1	17	0	0	0.00130368	0.0384366	0.316569	1	1	9.78569e-05	9606	Homo sapiens	DARS				R-HSA-2408546
R-HSA-8866427	VLDLR internalisation and degradation	0	12	1	6	0.000920245	0.0406522	0.316569	1	4	0.000391428	9606	Homo sapiens			ANXA2	Q8NBP7	R-HSA-8855111
R-HSA-70326	Glucose metabolism	2	127	0	16	0.00973926	0.0414316	0.316569	2	75	0.00733927	9606	Homo sapiens	ENO1				R-HSA-71660;R-HSA-70494
R-HSA-205025	NADE modulates death signalling	1	6	0	13	0.000460123	0.0428628	0.316569	1	3	0.000293571	9606	Homo sapiens	YWHAE				R-HSA-204981
R-HSA-168330	Viral RNP Complexes in the Host Cell Nucleus	1	15	0	8	0.00115031	0.0428628	0.316569	1	3	0.000293571	9606	Homo sapiens	HSPA1A				R-HSA-192746
R-HSA-189483	Heme degradation	1	20	0	0	0.00153374	0.0450685	0.316569	1	5	0.000489285	9606	Homo sapiens	BLVRB				R-HSA-189384
R-HSA-391251	Protein folding	2	105	0	44	0.00805215	0.0452242	0.316569	15	28	0.00273999	9606	Homo sapiens	TCP1;CCT8				R-HSA-6814119;R-HSA-8850534;R-HSA-390470;R-HSA-8850529;R-HSA-391266;R-HSA-389954;R-HSA-6814124;R-HSA-389961;R-HSA-8850539;R-HSA-6814121;R-HSA-6814120;R-HSA-390453;R-HSA-389970;R-HSA-8850527;R-HSA-390459
R-HSA-5620912	Anchoring of the basal body to the plasma membrane	2	99	0	70	0.00759202	0.0485739	0.340017	8	9	0.000880712	9606	Homo sapiens	YWHAE;ALB				R-HSA-5626228;R-HSA-5626227;R-HSA-5626220;R-HSA-5626223;R-HSA-5626681;R-HSA-5617816;R-HSA-5626699;R-HSA-5638009
R-HSA-72163	mRNA Splicing - Major Pathway	4	182	1	525	0.0139571	0.0533302	0.353159	8	9	0.000880712	9606	Homo sapiens	HNRNPK;HNRNPH1	P52597;P31943;P55795;P61978	HNRNPK	P84103;P38159	R-HSA-72160;R-HSA-72130;R-HSA-156661;R-HSA-72107;R-HSA-72139;R-HSA-72124;R-HSA-72143;R-HSA-72127
R-HSA-75035	Chk1/Chk2(Cds1) mediated inactivation of Cyclin B:Cdk1 complex	1	14	0	17	0.00107362	0.0560226	0.353159	2	5	0.000489285	9606	Homo sapiens	YWHAE				R-HSA-75016;R-HSA-75022
R-HSA-72172	mRNA Splicing	4	193	1	527	0.0148006	0.0564782	0.353159	8	14	0.00137	9606	Homo sapiens	HNRNPK;HNRNPH1	P52597;P31943;P55795;P61978	HNRNPK	P84103;P38159	R-HSA-72160;R-HSA-72130;R-HSA-156661;R-HSA-72107;R-HSA-72139;R-HSA-72124;R-HSA-72143;R-HSA-72127
R-HSA-6806942	MET Receptor Activation	0	9	1	22	0.000690184	0.0646977	0.353159	1	5	0.000489285	9606	Homo sapiens			DNAJA3	P08581	R-HSA-6800298
R-HSA-879518	Transport of organic anions	1	28	0	3	0.00214724	0.0668543	0.353159	3	8	0.000782855	9606	Homo sapiens	ALB				R-HSA-194130;R-HSA-194083;R-HSA-194079
R-HSA-168274	Export of Viral Ribonucleoproteins from Nucleus	1	20	0	14	0.00153374	0.0668543	0.353159	1	5	0.000489285	9606	Homo sapiens	HSPA1A				R-HSA-192746
R-HSA-5675482	Regulation of necroptotic cell death	0	20	1	21	0.00153374	0.0754324	0.353159	1	5	0.000489285	9606	Homo sapiens			ANXA1	Q13546	R-HSA-5357828
R-HSA-75205	Dissolution of Fibrin Clot	1	13	0	21	0.000996933	0.0754324	0.353159	1	19	0.00185928	9606	Homo sapiens	ANXA2				R-HSA-158750
R-HSA-111447	Activation of BAD and translocation to mitochondria	1	19	0	22	0.00145706	0.0775649	0.353159	2	5	0.000489285	9606	Homo sapiens	YWHAE				R-HSA-139906;R-HSA-139899
R-HSA-8875360	InlB-mediated entry of Listeria monocytogenes into host cell	0	18	1	20	0.00138037	0.0775649	0.353159	1	8	0.000782855	9606	Homo sapiens			DNAJA3	P08581	R-HSA-8875371
R-HSA-72203	Processing of Capped Intron-Containing Pre-mRNA	4	251	1	573	0.0192485	0.0822561	0.353159	10	32	0.00313142	9606	Homo sapiens	HNRNPK;HNRNPH1	P52597;P31943;P55795;P61978	HNRNPK	P84103;P38159	R-HSA-72160;R-HSA-72130;R-HSA-72103;R-HSA-156661;R-HSA-75096;R-HSA-72107;R-HSA-72139;R-HSA-72124;R-HSA-72143;R-HSA-72127
R-HSA-1852241	Organelle biogenesis and maintenance	4	428	0	377	0.0328221	0.084551	0.353159	9	96	0.00939427	9606	Homo sapiens	YWHAE;TCP1;ALB;CCT8				R-HSA-5626228;R-HSA-5626227;R-HSA-5624125;R-HSA-5626220;R-HSA-5626223;R-HSA-5626681;R-HSA-5617816;R-HSA-5626699;R-HSA-5638009
R-HSA-68882	Mitotic Anaphase	2	202	0	21	0.0154908	0.0850838	0.353159	1	11	0.00107643	9606	Homo sapiens	LMNA				R-HSA-2995376
R-HSA-171052	LDL-mediated lipid transport	0	30	1	12	0.00230061	0.086047	0.353159	1	22	0.00215285	9606	Homo sapiens			ANXA2	Q8NBP7	R-HSA-6784734
R-HSA-5213460	RIPK1-mediated regulated necrosis	0	27	1	25	0.00207055	0.094453	0.353159	2	13	0.00127214	9606	Homo sapiens			ANXA1	Q13546	R-HSA-5357828;R-HSA-5213462
R-HSA-5218859	Regulated Necrosis	0	27	1	25	0.00207055	0.094453	0.353159	2	13	0.00127214	9606	Homo sapiens			ANXA1	Q13546	R-HSA-5357828;R-HSA-5213462
R-HSA-112411	MAPK1 (ERK2) activation	0	12	1	32	0.000920245	0.0965428	0.353159	2	3	0.000293571	9606	Homo sapiens			HNRNPK	P36507	R-HSA-109858;R-HSA-109864
R-HSA-937041	IKK complex recruitment mediated by RIP1	0	26	1	23	0.00199387	0.0965428	0.353159	1	3	0.000293571	9606	Homo sapiens			ANXA1	Q13546	R-HSA-168921
R-HSA-71336	Pentose phosphate pathway (hexose monophosphate shunt)	1	30	0	17	0.00230061	0.100708	0.353159	1	15	0.00146785	9606	Homo sapiens	PGD				R-HSA-71299
R-HSA-68875	Mitotic Prophase	2	132	0	108	0.0101227	0.102755	0.353159	3	33	0.00322928	9606	Homo sapiens	LMNA				R-HSA-5229194;R-HSA-2993898;R-HSA-5244669
R-HSA-1810476	RIP-mediated NFkB activation via ZBP1	0	28	1	23	0.00214724	0.104855	0.353159	1	4	0.000391428	9606	Homo sapiens			ANXA1	Q13546	R-HSA-1810457
R-HSA-194223	HDL-mediated lipid transport	1	36	0	18	0.00276074	0.113092	0.353159	1	26	0.00254428	9606	Homo sapiens	ALB				R-HSA-264679
R-HSA-71387	Metabolism of carbohydrates	3	442	0	83	0.0338957	0.116397	0.353159	3	234	0.0228985	9606	Homo sapiens	ENO1;PGD				R-HSA-71299;R-HSA-71660;R-HSA-70494
R-HSA-2555396	Mitotic Metaphase and Anaphase	2	203	0	66	0.0155675	0.116808	0.353159	1	12	0.00117428	9606	Homo sapiens	LMNA				R-HSA-2995376
R-HSA-189445	Metabolism of porphyrins	1	54	0	0	0.0041411	0.117183	0.353159	1	21	0.002055	9606	Homo sapiens	BLVRB				R-HSA-189384
R-HSA-6807004	Negative regulation of MET activity	0	25	1	38	0.00191718	0.12531	0.353159	1	10	0.000978569	9606	Homo sapiens			DNAJA3	P08581	R-HSA-8875374
R-HSA-933543	NF-kB activation through FADD/RIP-1 pathway mediated by caspase-8 and -10	0	14	1	52	0.00107362	0.131357	0.353159	1	5	0.000489285	9606	Homo sapiens			ANXA1	Q13546	R-HSA-168934
R-HSA-5210891	Uptake and function of anthrax toxins	0	21	1	45	0.00161043	0.135366	0.353159	1	19	0.00185928	9606	Homo sapiens			HNRNPK	P36507	R-HSA-5211356
R-HSA-418990	Adherens junctions interactions	0	35	1	35	0.00268405	0.137364	0.353159	1	16	0.00156571	9606	Homo sapiens			ANXA2	P03950	R-HSA-5692437
R-HSA-192905	vRNP Assembly	0	14	1	53	0.00107362	0.141346	0.353159	1	2	0.000195714	9606	Homo sapiens			FKBP4	P07900	R-HSA-192830
R-HSA-6802952	Signaling by BRAF and RAF fusions	1	68	0	0	0.00521472	0.14531	0.353159	5	5	0.000489285	9606	Homo sapiens	LMNA				R-HSA-6802935;R-HSA-6802934;R-HSA-6802933;R-HSA-6802932;R-HSA-6802927
R-HSA-171306	Packaging Of Telomere Ends	0	34	1	38	0.00260736	0.14531	0.353159	2	2	0.000195714	9606	Homo sapiens			ANXA2	Q9NUX5	R-HSA-181450;R-HSA-176700
R-HSA-114452	Activation of BH3-only proteins	1	36	0	41	0.00276074	0.14531	0.353159	2	19	0.00185928	9606	Homo sapiens	YWHAE				R-HSA-139906;R-HSA-139899
R-HSA-381038	XBP1(S) activates chaperone genes	2	102	0	193	0.00782209	0.147829	0.353159	1	46	0.00450142	9606	Homo sapiens	LMNA				R-HSA-1791128
R-HSA-6785807	Interleukin-4 and 13 signaling	2	212	0	90	0.0162577	0.147829	0.353159	1	46	0.00450142	9606	Homo sapiens	ANXA1				R-HSA-6785895
R-HSA-159418	Recycling of bile acids and salts	1	37	0	37	0.00283742	0.149256	0.353159	5	12	0.00117428	9606	Homo sapiens	ALB				R-HSA-194130;R-HSA-194083;R-HSA-194153;R-HSA-194121;R-HSA-194079
R-HSA-381070	IRE1alpha activates chaperones	2	106	0	197	0.00812883	0.151822	0.353159	1	52	0.00508856	9606	Homo sapiens	LMNA				R-HSA-1791128
R-HSA-8854518	AURKA Activation by TPX2	1	74	0	2	0.00567485	0.159044	0.353159	2	2	0.000195714	9606	Homo sapiens	YWHAE				R-HSA-8853405;R-HSA-8853419
R-HSA-5602636	IKBKB deficiency causes SCID	0	3	1	76	0.000230061	0.160988	0.353159	1	1	9.78569e-05	9606	Homo sapiens			ANXA1	Q9Y6K9	R-HSA-5228840
R-HSA-397014	Muscle contraction	2	214	0	107	0.016411	0.16393	0.353159	1	39	0.00381642	9606	Homo sapiens	ANXA1;ANXA2				R-HSA-5263628
R-HSA-8876384	Listeria monocytogenes entry into host cells	0	26	1	65	0.00199387	0.180192	0.353159	1	13	0.00127214	9606	Homo sapiens			DNAJA3	P08581	R-HSA-8875371
R-HSA-1606322	ZBP1(DAI) mediated induction of type I IFNs	0	32	1	61	0.00245399	0.182089	0.353159	1	10	0.000978569	9606	Homo sapiens			ANXA1	Q13546	R-HSA-1810457
R-HSA-112409	RAF-independent MAPK1/3 activation	0	28	1	68	0.00214724	0.185869	0.353159	2	12	0.00117428	9606	Homo sapiens			HNRNPK	P36507	R-HSA-109858;R-HSA-109864
R-HSA-379716	Cytosolic tRNA aminoacylation	1	89	0	4	0.00682515	0.19338	0.353159	9	21	0.002055	9606	Homo sapiens	DARS				R-HSA-379861;R-HSA-379893;R-HSA-379974;R-HSA-379982;R-HSA-379993;R-HSA-379865;R-HSA-380008;R-HSA-379867;R-HSA-379994
R-HSA-6802957	Oncogenic MAPK signaling	1	84	0	10	0.00644172	0.195247	0.353159	5	34	0.00332714	9606	Homo sapiens	LMNA				R-HSA-6802935;R-HSA-6802934;R-HSA-6802933;R-HSA-6802932;R-HSA-6802927
R-HSA-5654738	Signaling by FGFR2	2	88	0	280	0.00674847	0.197001	0.353159	3	46	0.00450142	9606	Homo sapiens	HNRNPH1				R-HSA-6803527;R-HSA-6803838;R-HSA-6803836
R-HSA-437239	Recycling pathway of L1	1	54	0	48	0.0041411	0.202672	0.353159	4	14	0.00137	9606	Homo sapiens	EZR				R-HSA-374677;R-HSA-443779;R-HSA-445089;R-HSA-374680
R-HSA-8876198	RAB GEFs exchange GTP for GDP on RABs	1	94	0	9	0.00720859	0.211861	0.353159	2	21	0.002055	9606	Homo sapiens	YWHAE				R-HSA-8933452;R-HSA-8877612
R-HSA-190236	Signaling by FGFR	2	107	0	281	0.00820552	0.213857	0.353159	3	142	0.0138957	9606	Homo sapiens	HNRNPH1				R-HSA-6803527;R-HSA-6803838;R-HSA-6803836
R-HSA-445989	TAK1 activates NFkB by phosphorylation and activation of IKKs complex	0	39	1	76	0.0029908	0.217324	0.353159	1	4	0.000391428	9606	Homo sapiens			ANXA1	Q9Y6K9	R-HSA-5609665
R-HSA-425397	Transport of vitamins, nucleosides, and related molecules	1	100	0	9	0.00766871	0.220946	0.353159	3	33	0.00322928	9606	Homo sapiens	ALB				R-HSA-194130;R-HSA-194083;R-HSA-194079
R-HSA-421270	Cell-cell junction organization	0	65	1	51	0.00498466	0.220946	0.353159	1	19	0.00185928	9606	Homo sapiens			ANXA2	P03950	R-HSA-5692437
R-HSA-8849468	PTK6 Regulates Proteins Involved in RNA Processing	0	7	1	107	0.00053681	0.222751	0.353159	2	7	0.000684999	9606	Homo sapiens			HNRNPK	Q5VWX1;O75525	R-HSA-8849042;R-HSA-8849032
R-HSA-69473	G2/M DNA damage checkpoint	1	81	0	38	0.00621166	0.224551	0.353159	2	12	0.00117428	9606	Homo sapiens	YWHAE				R-HSA-75016;R-HSA-75022
R-HSA-2168880	Scavenging of heme from plasma	1	107	0	11	0.00820552	0.237043	0.353159	1	12	0.00117428	9606	Homo sapiens	ALB				R-HSA-2168887
R-HSA-380259	Loss of Nlp from mitotic centrosomes	1	71	0	53	0.00544479	0.245845	0.353159	2	2	0.000195714	9606	Homo sapiens	YWHAE				R-HSA-380272;R-HSA-380303
R-HSA-69278	Cell Cycle, Mitotic	4	533	0	697	0.0408742	0.247402	0.353159	17	294	0.0287699	9606	Homo sapiens	YWHAE;LMNA;FKBP4				R-HSA-380455;R-HSA-380294;R-HSA-5229194;R-HSA-2993898;R-HSA-380303;R-HSA-8853419;R-HSA-8852362;R-HSA-5244669;R-HSA-380311;R-HSA-3000319;R-HSA-380272;R-HSA-2574845;R-HSA-8853405;R-HSA-3000310;R-HSA-2995376;R-HSA-380283;R-HSA-2574840
R-HSA-380284	Loss of proteins required for interphase microtubule organization from the centrosome	1	71	0	55	0.00544479	0.249338	0.353159	3	3	0.000293571	9606	Homo sapiens	YWHAE				R-HSA-380294;R-HSA-380272;R-HSA-380303
R-HSA-381119	Unfolded Protein Response (UPR)	2	149	0	282	0.0114264	0.253964	0.353159	1	72	0.0070457	9606	Homo sapiens	LMNA				R-HSA-1791128
R-HSA-5336415	Uptake and function of diphtheria toxin	0	10	1	119	0.000766871	0.254548	0.353159	1	5	0.000489285	9606	Homo sapiens			FKBP4	P07900	R-HSA-5336420
R-HSA-203615	eNOS activation	0	35	1	101	0.00268405	0.264863	0.353159	1	18	0.00176142	9606	Homo sapiens			FKBP4	P07900	R-HSA-202129
R-HSA-156842	Eukaryotic Translation Elongation	1	104	1	34	0.00797546	0.26827	0.353159	2	9	0.000880712	9606	Homo sapiens	EEF1G	P26641	EEF1G	P29692;P24534	R-HSA-156913;R-HSA-156910
R-HSA-5218920	VEGFR2 mediated vascular permeability	0	44	1	97	0.00337423	0.26827	0.353159	1	15	0.00146785	9606	Homo sapiens			FKBP4	P07900	R-HSA-202129
R-HSA-109606	Intrinsic Pathway for Apoptosis	1	49	0	113	0.00375767	0.269968	0.353159	2	46	0.00450142	9606	Homo sapiens	YWHAE				R-HSA-139906;R-HSA-139899
R-HSA-380270	Recruitment of mitotic centrosome proteins and complexes	1	97	0	47	0.00743865	0.281746	0.353159	3	6	0.000587142	9606	Homo sapiens	YWHAE				R-HSA-380311;R-HSA-380455;R-HSA-380283
R-HSA-68886	M Phase	2	319	0	158	0.0244632	0.28488	0.353159	4	63	0.00616499	9606	Homo sapiens	LMNA				R-HSA-5229194;R-HSA-2993898;R-HSA-2995376;R-HSA-5244669
R-HSA-450408	AUF1 (hnRNP D0) binds and destabilizes mRNA	1	56	1	93	0.00429448	0.285077	0.353159	2	4	0.000391428	9606	Homo sapiens	HSPA1A	P0DMV8	FKBP4	P04792	R-HSA-450551;R-HSA-450580
R-HSA-5638302	Signaling by Overexpressed Wild-Type EGFR in Cancer	0	6	1	142	0.000460123	0.286737	0.353159	1	2	0.000195714	9606	Homo sapiens			ANXA1	P00533	R-HSA-1248677
R-HSA-5638303	Inhibition of Signaling by Overexpressed EGFR	0	6	1	142	0.000460123	0.286737	0.353159	1	2	0.000195714	9606	Homo sapiens			ANXA1	P00533	R-HSA-1248677
R-HSA-8855121	VLDL interactions	0	29	1	119	0.00222393	0.288393	0.353159	1	16	0.00156571	9606	Homo sapiens			ANXA2	Q8NBP7	R-HSA-8855111
R-HSA-6796648	TP53 Regulates Transcription of DNA Repair Genes	0	89	1	68	0.00682515	0.29498	0.353159	1	17	0.00166357	9606	Homo sapiens			ANXA2	P40692	R-HSA-6806392
R-HSA-5602358	Diseases associated with the TLR signaling cascade	0	35	1	130	0.00268405	0.298251	0.353159	1	14	0.00137	9606	Homo sapiens			ANXA1	Q9Y6K9	R-HSA-5228840
R-HSA-5260271	Diseases of Immune System	0	35	1	130	0.00268405	0.298251	0.353159	1	14	0.00137	9606	Homo sapiens			ANXA1	Q9Y6K9	R-HSA-5228840
R-HSA-8866911	TFAP2 (AP-2) family regulates transcription of cell cycle factors	0	6	1	148	0.000460123	0.299881	0.353159	1	4	0.000391428	9606	Homo sapiens			LMNA	P01106	R-HSA-8865265
R-HSA-2179392	EGFR Transactivation by Gastrin	0	12	1	144	0.000920245	0.299881	0.353159	1	6	0.000587142	9606	Homo sapiens			ANXA1	P00533	R-HSA-2179387
R-HSA-4411364	Binding of TCF/LEF:CTNNB1 to target gene promoters	0	9	1	146	0.000690184	0.301507	0.353159	1	4	0.000391428	9606	Homo sapiens			LMNA	P01106	R-HSA-4411357
R-HSA-380287	Centrosome maturation	1	97	0	61	0.00743865	0.30313	0.353159	6	9	0.000880712	9606	Homo sapiens	YWHAE				R-HSA-380311;R-HSA-380455;R-HSA-380294;R-HSA-380272;R-HSA-380303;R-HSA-380283
R-HSA-114608	Platelet degranulation	1	137	0	23	0.0105061	0.309584	0.353159	1	11	0.00107643	9606	Homo sapiens	ALB				R-HSA-481007
R-HSA-2028269	Signaling by Hippo	1	22	1	150	0.00168712	0.309584	0.353159	2	30	0.00293571	9606	Homo sapiens	YWHAE	P62258	ANXA1	Q13043	R-HSA-2028651;R-HSA-2028692
R-HSA-5619102	SLC transporter disorders	1	149	0	11	0.0114264	0.309584	0.353159	2	65	0.0063607	9606	Homo sapiens	ALB				R-HSA-5661184;R-HSA-5661198
R-HSA-8852276	The role of GTSE1 in G2/M progression after G2 checkpoint	1	82	0	84	0.00628834	0.311188	0.353159	1	10	0.000978569	9606	Homo sapiens	FKBP4				R-HSA-8852362
R-HSA-157579	Telomere Maintenance	0	76	1	95	0.00582822	0.311188	0.353159	2	23	0.00225071	9606	Homo sapiens			ANXA2	Q9NUX5	R-HSA-181450;R-HSA-176700
R-HSA-6804754	Regulation of TP53 Expression	0	4	1	160	0.000306748	0.314386	0.353159	2	5	0.000489285	9606	Homo sapiens			HNRNPK	P04637	R-HSA-6804188;R-HSA-6804762
R-HSA-69275	G2/M Transition	2	202	0	322	0.0154908	0.316581	0.353159	13	82	0.00802427	9606	Homo sapiens	YWHAE;FKBP4				R-HSA-380455;R-HSA-380294;R-HSA-380303;R-HSA-8853419;R-HSA-8852362;R-HSA-380311;R-HSA-3000319;R-HSA-380272;R-HSA-2574845;R-HSA-8853405;R-HSA-3000310;R-HSA-380283;R-HSA-2574840
R-HSA-5628897	TP53 Regulates Metabolic Genes	1	124	0	50	0.0095092	0.31757	0.353159	2	34	0.00332714	9606	Homo sapiens	YWHAE				R-HSA-5632738;R-HSA-5632732
R-HSA-453274	Mitotic G2-G2/M phases	2	204	0	322	0.0156442	0.318289	0.353159	13	84	0.00821998	9606	Homo sapiens	YWHAE;FKBP4				R-HSA-380455;R-HSA-380294;R-HSA-380303;R-HSA-8853419;R-HSA-8852362;R-HSA-380311;R-HSA-3000319;R-HSA-380272;R-HSA-2574845;R-HSA-8853405;R-HSA-3000310;R-HSA-380283;R-HSA-2574840
R-HSA-159236	Transport of Mature mRNA derived from an Intron-Containing Transcript	0	79	1	101	0.00605828	0.323893	0.353159	1	4	0.000391428	9606	Homo sapiens			HNRNPK	P84103	R-HSA-75096
R-HSA-1445148	Translocation of GLUT4 to the plasma membrane	1	87	0	88	0.00667178	0.33016	0.353159	2	15	0.00146785	9606	Homo sapiens	YWHAE				R-HSA-1454689;R-HSA-1445149
R-HSA-450604	KSRP (KHSRP) binds and destabilizes mRNA	0	20	1	155	0.00153374	0.331718	0.353159	1	5	0.000489285	9606	Homo sapiens			LMNA	P63104	R-HSA-450620
R-HSA-168638	NOD1/2 Signaling Pathway	0	39	1	151	0.0029908	0.339454	0.353159	1	17	0.00166357	9606	Homo sapiens			ANXA1	Q9Y6K9	R-HSA-622415
R-HSA-164944	Nef and signal transduction	0	9	1	178	0.000690184	0.34099	0.353159	1	5	0.000489285	9606	Homo sapiens			HNRNPK	Q92608	R-HSA-200952
R-HSA-2565942	Regulation of PLK1 Activity at G2/M Transition	1	92	0	92	0.00705521	0.342524	0.353159	4	12	0.00117428	9606	Homo sapiens	YWHAE				R-HSA-3000319;R-HSA-2574845;R-HSA-3000310;R-HSA-2574840
R-HSA-194068	Bile acid and bile salt metabolism	1	120	0	65	0.00920245	0.342524	0.353159	5	94	0.00919855	9606	Homo sapiens	ALB				R-HSA-194130;R-HSA-194083;R-HSA-194153;R-HSA-194121;R-HSA-194079
R-HSA-69481	G2/M Checkpoints	1	154	0	44	0.0118098	0.347102	0.353159	2	24	0.00234857	9606	Homo sapiens	YWHAE				R-HSA-75016;R-HSA-75022
R-HSA-2173782	Binding and Uptake of Ligands by Scavenger Receptors	1	169	0	16	0.0129601	0.347102	0.353159	1	32	0.00313142	9606	Homo sapiens	ALB				R-HSA-2168887
R-HSA-379724	tRNA Aminoacylation	1	107	0	79	0.00820552	0.350138	0.353159	9	42	0.00410999	9606	Homo sapiens	DARS				R-HSA-379861;R-HSA-379893;R-HSA-379974;R-HSA-379982;R-HSA-379993;R-HSA-379865;R-HSA-380008;R-HSA-379867;R-HSA-379994
R-HSA-4570464	SUMOylation of RNA binding proteins	1	49	0	144	0.00375767	0.353159	0.353159	1	4	0.000391428	9606	Homo sapiens	HNRNPK				R-HSA-4570499
R-HSA-445144	Signal transduction by L1	0	25	1	165	0.00191718	0.353159	0.353159	1	11	0.00107643	9606	Homo sapiens			ANXA1	P00533	R-HSA-445069
R-HSA-73886	Chromosome Maintenance	0	104	1	95	0.00797546	0.354665	0.354665	2	27	0.00264214	9606	Homo sapiens			ANXA2	Q9NUX5	R-HSA-181450;R-HSA-176700
R-HSA-8863678	Neurodegenerative Diseases	2	30	0	522	0.00230061	0.357282	0.357282	2	22	0.00215285	9606	Homo sapiens	YWHAE;LMNA				R-HSA-8863674;R-HSA-8868344
R-HSA-8862803	Deregulated CDK5 triggers multiple neurodegenerative pathways in Alzheimer's disease models	2	30	0	522	0.00230061	0.357282	0.357282	2	22	0.00215285	9606	Homo sapiens	YWHAE;LMNA				R-HSA-8863674;R-HSA-8868344
R-HSA-2408522	Selenoamino acid metabolism	1	188	0	6	0.0144172	0.362142	0.362142	1	32	0.00313142	9606	Homo sapiens	DARS				R-HSA-2408546
R-HSA-202131	Metabolism of nitric oxide	0	58	1	149	0.00444785	0.375388	0.375388	1	38	0.00371856	9606	Homo sapiens			FKBP4	P07900	R-HSA-202129
R-HSA-203765	eNOS activation and regulation	0	58	1	149	0.00444785	0.375388	0.375388	1	38	0.00371856	9606	Homo sapiens			FKBP4	P07900	R-HSA-202129
R-HSA-5625740	RHO GTPases activate PKNs	1	79	0	128	0.00605828	0.379744	0.379744	1	20	0.00195714	9606	Homo sapiens	YWHAE				R-HSA-75016
R-HSA-76005	Response to elevated platelet cytosolic Ca2+	1	144	0	67	0.0110429	0.385506	0.385506	1	14	0.00137	9606	Homo sapiens	ALB				R-HSA-481007
R-HSA-164952	The role of Nef in HIV-1 replication and disease pathogenesis	0	29	1	198	0.00222393	0.395463	0.395463	1	20	0.00195714	9606	Homo sapiens			HNRNPK	Q92608	R-HSA-200952
R-HSA-5637810	Constitutive Signaling by EGFRvIII	0	26	1	207	0.00199387	0.402479	0.402479	1	18	0.00176142	9606	Homo sapiens			ANXA1	P00533	R-HSA-1247999
R-HSA-5637812	Signaling by EGFRvIII in Cancer	0	26	1	207	0.00199387	0.402479	0.402479	1	18	0.00176142	9606	Homo sapiens			ANXA1	P00533	R-HSA-1247999
R-HSA-912446	Meiotic recombination	0	60	1	176	0.00460123	0.403873	0.403873	1	8	0.000782855	9606	Homo sapiens			ANXA2	P40692	R-HSA-912429
R-HSA-72202	Transport of Mature Transcript to Cytoplasm	0	88	1	162	0.00674847	0.406651	0.406651	1	13	0.00127214	9606	Homo sapiens			HNRNPK	P84103	R-HSA-75096
R-HSA-168273	Influenza Viral RNA Transcription and Replication	0	171	1	62	0.0131135	0.410794	0.410794	1	15	0.00146785	9606	Homo sapiens			FKBP4	P07900	R-HSA-192830
R-HSA-5339562	Uptake and actions of bacterial toxins	0	59	2	178	0.00452454	0.41354	0.41354	2	65	0.0063607	9606	Homo sapiens			HNRNPK;FKBP4	P07900;P36507	R-HSA-5211356;R-HSA-5336420
R-HSA-2644602	Signaling by NOTCH1 PEST Domain Mutants in Cancer	0	67	1	176	0.00513804	0.417636	0.417636	1	21	0.002055	9606	Homo sapiens			LMNA	P01106	R-HSA-2220985
R-HSA-2644606	Constitutive Signaling by NOTCH1 PEST Domain Mutants	0	67	1	176	0.00513804	0.417636	0.417636	1	21	0.002055	9606	Homo sapiens			LMNA	P01106	R-HSA-2220985
R-HSA-2894862	Constitutive Signaling by NOTCH1 HD+PEST Domain Mutants	0	67	1	176	0.00513804	0.417636	0.417636	1	21	0.002055	9606	Homo sapiens			LMNA	P01106	R-HSA-2220985
R-HSA-2894858	Signaling by NOTCH1 HD+PEST Domain Mutants in Cancer	0	67	1	176	0.00513804	0.417636	0.417636	1	21	0.002055	9606	Homo sapiens			LMNA	P01106	R-HSA-2220985
R-HSA-2644603	Signaling by NOTCH1 in Cancer	0	67	1	176	0.00513804	0.417636	0.417636	1	39	0.00381642	9606	Homo sapiens			LMNA	P01106	R-HSA-2220985
R-HSA-1643713	Signaling by EGFR in Cancer	0	38	1	207	0.00291411	0.418996	0.418996	2	42	0.00410999	9606	Homo sapiens			ANXA1	P00533	R-HSA-1248677;R-HSA-1247999
R-HSA-204998	Cell death signalling via NRAGE, NRIF and NADE	1	79	0	166	0.00605828	0.423055	0.423055	1	17	0.00166357	9606	Homo sapiens	YWHAE				R-HSA-204981
R-HSA-375276	Peptide ligand-binding receptors	1	194	0	48	0.0148773	0.429758	0.429758	2	73	0.00714356	9606	Homo sapiens	ANXA1				R-HSA-444476;R-HSA-391913
R-HSA-416476	G alpha (q) signalling events	1	240	0	6	0.0184049	0.435067	0.435067	3	20	0.00195714	9606	Homo sapiens	ANXA1				R-HSA-749448;R-HSA-749452;R-HSA-379048
R-HSA-2122947	NOTCH1 Intracellular Domain Regulates Transcription	0	56	1	201	0.00429448	0.435067	0.435067	1	16	0.00156571	9606	Homo sapiens			LMNA	P01106	R-HSA-1980067
R-HSA-109581	Apoptosis	2	179	0	530	0.013727	0.450236	0.450236	3	122	0.0119385	9606	Homo sapiens	YWHAE;LMNA				R-HSA-139906;R-HSA-264865;R-HSA-139899
R-HSA-72766	Translation	1	178	1	101	0.0136503	0.458364	0.458364	2	40	0.00391428	9606	Homo sapiens	EEF1G	P26641	EEF1G	P29692;P24534	R-HSA-156913;R-HSA-156910
R-HSA-174824	Lipoprotein metabolism	1	96	1	180	0.00736196	0.464668	0.464668	3	84	0.00821998	9606	Homo sapiens	ALB	P02768	ANXA2	Q8NBP7	R-HSA-8855111;R-HSA-264679;R-HSA-6784734
R-HSA-5357801	Programmed Cell Death	2	187	1	544	0.0143405	0.465053	0.465053	5	135	0.0132107	9606	Homo sapiens	YWHAE;LMNA	P02545-1;P62258	ANXA1	Q13546	R-HSA-139906;R-HSA-264865;R-HSA-5357828;R-HSA-5213462;R-HSA-139899
R-HSA-5619115	Disorders of transmembrane transporters	1	245	0	28	0.0187883	0.467169	0.467169	2	87	0.00851355	9606	Homo sapiens	ALB				R-HSA-5661184;R-HSA-5661198
R-HSA-446728	Cell junction organization	0	92	1	197	0.00705521	0.468416	0.468416	1	35	0.00342499	9606	Homo sapiens			ANXA2	P03950	R-HSA-5692437
R-HSA-1221632	Meiotic synapsis	1	63	1	217	0.00483129	0.469659	0.469659	1	6	0.000587142	9606	Homo sapiens	LMNA	P02545-2	LMNA	Q9UH99	R-HSA-912408
R-HSA-168255	Influenza Life Cycle	1	183	1	118	0.0140337	0.489175	0.489175	2	52	0.00508856	9606	Homo sapiens	HSPA1A	P0DMV8	FKBP4	P07900	R-HSA-192746;R-HSA-192830
R-HSA-3232118	SUMOylation of transcription factors	0	17	1	284	0.00130368	0.490372	0.490372	1	9	0.000880712	9606	Homo sapiens			HNRNPK	P04637	R-HSA-2997706
R-HSA-1980143	Signaling by NOTCH1	0	82	1	226	0.00628834	0.493944	0.493944	1	37	0.00362071	9606	Homo sapiens			LMNA	P01106	R-HSA-1980067
R-HSA-1640170	Cell Cycle	4	645	2	1140	0.0494632	0.497523	0.497523	23	383	0.0374792	9606	Homo sapiens	YWHAE;LMNA;FKBP4	Q9UIM3;P02545-1;P02545-2;P62258	ANXA2;LMNA	Q9UH99;P40692;Q9NUX5	R-HSA-912429;R-HSA-380455;R-HSA-380294;R-HSA-5229194;R-HSA-2993898;R-HSA-181450;R-HSA-75016;R-HSA-380303;R-HSA-8853419;R-HSA-8852362;R-HSA-5244669;R-HSA-75022;R-HSA-380311;R-HSA-3000319;R-HSA-912408;R-HSA-380272;R-HSA-2574845;R-HSA-8853405;R-HSA-3000310;R-HSA-2995376;R-HSA-176700;R-HSA-380283;R-HSA-2574840
R-HSA-373752	Netrin-1 signaling	1	50	0	261	0.00383436	0.502185	0.502185	3	31	0.00303356	9606	Homo sapiens	EZR				R-HSA-374663;R-HSA-374662;R-HSA-374664
R-HSA-1834949	Cytosolic sensors of pathogen-associated DNA	0	86	1	231	0.00659509	0.502185	0.502185	1	47	0.00459928	9606	Homo sapiens			ANXA1	Q13546	R-HSA-1810457
R-HSA-111465	Apoptotic cleavage of cellular proteins	1	38	0	272	0.00291411	0.505677	0.505677	1	36	0.00352285	9606	Homo sapiens	LMNA				R-HSA-264865
R-HSA-168643	Nucleotide-binding domain, leucine rich repeat containing receptor (NLR) signaling pathways	0	65	1	262	0.00498466	0.509144	0.509144	1	44	0.00430571	9606	Homo sapiens			ANXA1	Q9Y6K9	R-HSA-622415
R-HSA-6806834	Signaling by MET	0	87	1	239	0.00667178	0.511443	0.511443	2	49	0.00479499	9606	Homo sapiens			DNAJA3	P08581	R-HSA-8875374;R-HSA-6800298
R-HSA-216083	Integrin cell surface interactions	0	87	1	238	0.00667178	0.518276	0.518276	2	55	0.00538213	9606	Homo sapiens			ANXA2	P19320	R-HSA-265428;R-HSA-198941
R-HSA-2173796	SMAD2/SMAD3:SMAD4 heterotrimer regulates transcription	0	39	1	284	0.0029908	0.519406	0.519406	1	17	0.00166357	9606	Homo sapiens			LMNA	P01106	R-HSA-1484099
R-HSA-418594	G alpha (i) signalling events	1	326	0	0	0.025	0.531665	0.531665	3	8	0.000782855	9606	Homo sapiens	ANXA1				R-HSA-749454;R-HSA-749456;R-HSA-380073
R-HSA-168254	Influenza Infection	1	195	1	151	0.014954	0.538222	0.538222	2	60	0.00587142	9606	Homo sapiens	HSPA1A	P0DMV8	FKBP4	P07900	R-HSA-192746;R-HSA-192830
R-HSA-975138	TRAF6 mediated induction of NFkB and MAP kinases upon TLR7/8 or 9 activation	0	102	1	270	0.00782209	0.545759	0.545759	1	47	0.00459928	9606	Homo sapiens			ANXA1	Q9Y6K9	R-HSA-5609665
R-HSA-75153	Apoptotic execution phase	1	55	0	295	0.00421779	0.545759	0.545759	1	54	0.00528427	9606	Homo sapiens	LMNA				R-HSA-264865
R-HSA-975871	MyD88 cascade initiated on plasma membrane	0	92	1	291	0.00705521	0.553177	0.553177	1	57	0.00557785	9606	Homo sapiens			ANXA1	Q9Y6K9	R-HSA-5609665
R-HSA-168176	Toll Like Receptor 5 (TLR5) Cascade	0	92	1	291	0.00705521	0.553177	0.553177	1	58	0.0056757	9606	Homo sapiens			ANXA1	Q9Y6K9	R-HSA-5609665
R-HSA-168142	Toll Like Receptor 10 (TLR10) Cascade	0	92	1	291	0.00705521	0.553177	0.553177	1	58	0.0056757	9606	Homo sapiens			ANXA1	Q9Y6K9	R-HSA-5609665
R-HSA-73923	Lipid digestion, mobilization, and transport	1	157	1	200	0.0120399	0.557362	0.557362	3	118	0.0115471	9606	Homo sapiens	ALB	P02768	ANXA2	Q8NBP7	R-HSA-8855111;R-HSA-264679;R-HSA-6784734
R-HSA-3769402	Deactivation of the beta-catenin transactivating complex	0	44	1	327	0.00337423	0.560476	0.560476	1	14	0.00137	9606	Homo sapiens			LMNA	P63104	R-HSA-3769393
R-HSA-193704	p75 NTR receptor-mediated signalling	1	107	0	268	0.00820552	0.564595	0.564595	1	49	0.00479499	9606	Homo sapiens	YWHAE				R-HSA-204981
R-HSA-975155	MyD88 dependent cascade initiated on endosome	0	104	1	300	0.00797546	0.573725	0.573725	1	62	0.00606713	9606	Homo sapiens			ANXA1	Q9Y6K9	R-HSA-5609665
R-HSA-168181	Toll Like Receptor 7/8 (TLR7/8) Cascade	0	104	1	300	0.00797546	0.573725	0.573725	1	63	0.00616499	9606	Homo sapiens			ANXA1	Q9Y6K9	R-HSA-5609665
R-HSA-5687128	MAPK6/MAPK4 signaling	0	105	2	278	0.00805215	0.574728	0.574728	3	40	0.00391428	9606	Homo sapiens			LMNA;FKBP4	P01106;P04792	R-HSA-5687121;R-HSA-5687083;R-HSA-5687113
R-HSA-168138	Toll Like Receptor 9 (TLR9) Cascade	0	107	1	300	0.00820552	0.576727	0.576727	1	66	0.00645856	9606	Homo sapiens			ANXA1	Q9Y6K9	R-HSA-5609665
R-HSA-5684996	MAPK1/MAPK3 signaling	0	274	1	119	0.0210123	0.577723	0.577723	2	46	0.00450142	9606	Homo sapiens			HNRNPK	P36507	R-HSA-109858;R-HSA-109864
R-HSA-166058	MyD88:Mal cascade initiated on plasma membrane	0	108	1	310	0.00828221	0.583651	0.583651	1	62	0.00606713	9606	Homo sapiens			ANXA1	Q9Y6K9	R-HSA-5609665
R-HSA-168188	Toll Like Receptor TLR6:TLR2 Cascade	0	108	1	311	0.00828221	0.584631	0.584631	1	64	0.00626284	9606	Homo sapiens			ANXA1	Q9Y6K9	R-HSA-5609665
R-HSA-168179	Toll Like Receptor TLR1:TLR2 Cascade	0	111	1	311	0.00851227	0.587558	0.587558	1	64	0.00626284	9606	Homo sapiens			ANXA1	Q9Y6K9	R-HSA-5609665
R-HSA-181438	Toll Like Receptor 2 (TLR2) Cascade	0	111	1	311	0.00851227	0.587558	0.587558	1	66	0.00645856	9606	Homo sapiens			ANXA1	Q9Y6K9	R-HSA-5609665
R-HSA-168928	RIG-I/MDA5 mediated induction of IFN-alpha/beta pathways	0	87	1	318	0.00667178	0.592392	0.592392	1	46	0.00450142	9606	Homo sapiens			ANXA1	Q13546	R-HSA-168934
R-HSA-69620	Cell Cycle Checkpoints	1	188	0	242	0.0144172	0.598119	0.598119	2	58	0.0056757	9606	Homo sapiens	YWHAE				R-HSA-75016;R-HSA-75022
R-HSA-8866910	TFAP2 (AP-2) family regulates transcription of growth factors and their receptors	0	21	1	379	0.00161043	0.601894	0.601894	1	18	0.00176142	9606	Homo sapiens			ANXA1	P00533	R-HSA-8874797
R-HSA-1500620	Meiosis	1	94	2	338	0.00720859	0.615743	0.615743	2	14	0.00137	9606	Homo sapiens	LMNA	P02545-2	ANXA2;LMNA	Q9UH99;P40692	R-HSA-912429;R-HSA-912408
R-HSA-6806003	Regulation of TP53 Expression and Degradation	0	45	1	382	0.00345092	0.621151	0.621151	2	35	0.00342499	9606	Homo sapiens			HNRNPK	P04637	R-HSA-6804188;R-HSA-6804762
R-HSA-450531	Regulation of mRNA stability by proteins that bind AU-rich elements	1	93	2	347	0.0071319	0.630873	0.630873	3	26	0.00254428	9606	Homo sapiens	HSPA1A	P0DMV8	LMNA;FKBP4	P04792;P63104	R-HSA-450551;R-HSA-450580;R-HSA-450620
R-HSA-1500931	Cell-Cell communication	0	144	1	321	0.0110429	0.630873	0.630873	1	63	0.00616499	9606	Homo sapiens			ANXA2	P03950	R-HSA-5692437
R-HSA-937061	TRIF-mediated TLR3/TLR4 signaling	0	109	1	371	0.0083589	0.636072	0.636072	2	57	0.00557785	9606	Homo sapiens			ANXA1	Q13546;Q9Y6K9	R-HSA-5609665;R-HSA-168921
R-HSA-166166	MyD88-independent TLR3/TLR4 cascade	0	109	1	371	0.0083589	0.636072	0.636072	2	60	0.00587142	9606	Homo sapiens			ANXA1	Q13546;Q9Y6K9	R-HSA-5609665;R-HSA-168921
R-HSA-168164	Toll Like Receptor 3 (TLR3) Cascade	0	109	1	374	0.0083589	0.638645	0.638645	2	61	0.00596927	9606	Homo sapiens			ANXA1	Q13546;Q9Y6K9	R-HSA-5609665;R-HSA-168921
R-HSA-2173793	Transcriptional activity of SMAD2/SMAD3:SMAD4 heterotrimer	0	55	1	402	0.00421779	0.641201	0.641201	1	38	0.00371856	9606	Homo sapiens			LMNA	P01106	R-HSA-1484099
R-HSA-373076	Class A/1 (Rhodopsin-like receptors)	1	399	0	58	0.0305982	0.655352	0.655352	2	142	0.0138957	9606	Homo sapiens	ANXA1				R-HSA-444476;R-HSA-391913
R-HSA-157118	Signaling by NOTCH	0	153	1	333	0.0117331	0.661019	0.661019	1	95	0.00929641	9606	Homo sapiens			LMNA	P01106	R-HSA-1980067
R-HSA-5357905	Regulation of TNFR1 signaling	0	39	1	454	0.0029908	0.672083	0.672083	2	14	0.00137	9606	Homo sapiens			ANXA1	Q13546	R-HSA-5357828;R-HSA-5634221
R-HSA-166054	Activated TLR4 signalling	0	129	1	413	0.00989264	0.679009	0.679009	2	85	0.00831784	9606	Homo sapiens			ANXA1	Q13546;Q9Y6K9	R-HSA-5609665;R-HSA-168921
R-HSA-201722	Formation of the beta-catenin:TCF transactivating complex	0	66	1	446	0.00506135	0.683547	0.683547	1	13	0.00127214	9606	Homo sapiens			LMNA	P01106	R-HSA-4411357
R-HSA-198933	Immunoregulatory interactions between a Lymphoid and a non-Lymphoid cell	0	310	1	204	0.023773	0.696789	0.696789	1	41	0.00401213	9606	Homo sapiens			ANXA2	P19320	R-HSA-198941
R-HSA-166016	Toll Like Receptor 4 (TLR4) Cascade	0	143	1	434	0.0109663	0.703206	0.703206	2	94	0.00919855	9606	Homo sapiens			ANXA1	Q13546;Q9Y6K9	R-HSA-5609665;R-HSA-168921
R-HSA-8848021	Signaling by PTK6	0	80	1	463	0.00613497	0.70391	0.70391	2	52	0.00508856	9606	Homo sapiens			HNRNPK	Q5VWX1;O75525	R-HSA-8849042;R-HSA-8849032
R-HSA-512988	Interleukin-3, 5 and GM-CSF signaling	0	293	1	278	0.0224693	0.708105	0.708105	1	77	0.00753498	9606	Homo sapiens			LMNA	P63104	R-HSA-912757
R-HSA-75893	TNF signaling	0	50	1	511	0.00383436	0.720344	0.720344	3	29	0.00283785	9606	Homo sapiens			ANXA1	Q13546	R-HSA-5357828;R-HSA-5634221;R-HSA-83656
R-HSA-162909	Host Interactions of HIV factors	0	148	1	443	0.0113497	0.735887	0.735887	1	54	0.00528427	9606	Homo sapiens			HNRNPK	Q92608	R-HSA-200952
R-HSA-168898	Toll-Like Receptors Cascades	0	182	1	450	0.0139571	0.73964	0.73964	2	161	0.015755	9606	Homo sapiens			ANXA1	Q13546;Q9Y6K9	R-HSA-5609665;R-HSA-168921
R-HSA-425407	SLC-mediated transmembrane transport	1	456	0	122	0.0349693	0.74026	0.74026	3	193	0.0188864	9606	Homo sapiens	ALB				R-HSA-194130;R-HSA-194083;R-HSA-194079
R-HSA-373760	L1CAM interactions	1	129	1	464	0.00989264	0.742112	0.742112	5	54	0.00528427	9606	Homo sapiens	EZR	P15311	ANXA1	P00533	R-HSA-374677;R-HSA-443779;R-HSA-445089;R-HSA-445069;R-HSA-374680
R-HSA-73887	Death Receptor Signalling	0	58	1	546	0.00444785	0.742727	0.742727	3	39	0.00381642	9606	Homo sapiens			ANXA1	Q13546	R-HSA-5357828;R-HSA-5634221;R-HSA-83656
R-HSA-170834	Signaling by TGF-beta Receptor Complex	0	84	1	530	0.00644172	0.747592	0.747592	1	82	0.00802427	9606	Homo sapiens			LMNA	P01106	R-HSA-1484099
R-HSA-195258	RHO GTPase Effectors	1	307	0	324	0.0235429	0.753548	0.753548	1	103	0.0100793	9606	Homo sapiens	YWHAE				R-HSA-75016
R-HSA-3108232	SUMO E3 ligases SUMOylate target proteins	1	103	1	556	0.00789877	0.770606	0.770606	2	46	0.00450142	9606	Homo sapiens	HNRNPK	P61978	HNRNPK	P04637	R-HSA-4570499;R-HSA-2997706
R-HSA-1474244	Extracellular matrix organization	0	321	1	338	0.0246166	0.772248	0.772248	2	314	0.0307271	9606	Homo sapiens			ANXA2	P19320	R-HSA-265428;R-HSA-198941
R-HSA-500792	GPCR ligand binding	1	587	0	67	0.0450153	0.782379	0.782379	2	168	0.01644	9606	Homo sapiens	ANXA1				R-HSA-444476;R-HSA-391913
R-HSA-5683057	MAPK family signaling cascades	0	324	3	367	0.0248466	0.7829	0.7829	5	86	0.0084157	9606	Homo sapiens			HNRNPK;LMNA;FKBP4	P36507;P01106;P04792	R-HSA-109858;R-HSA-5687121;R-HSA-109864;R-HSA-5687083;R-HSA-5687113
R-HSA-449147	Signaling by Interleukins	2	662	1	692	0.0507669	0.784169	0.784169	2	281	0.0274978	9606	Homo sapiens	ANXA1	P04083;ENSG00000135046	LMNA	P63104	R-HSA-6785895;R-HSA-912757
R-HSA-2990846	SUMOylation	1	112	1	597	0.00858896	0.794057	0.794057	2	55	0.00538213	9606	Homo sapiens	HNRNPK	P61978	HNRNPK	P04637	R-HSA-4570499;R-HSA-2997706
R-HSA-76002	Platelet activation, signaling and aggregation	1	305	0	428	0.0233896	0.800384	0.800384	1	114	0.0111557	9606	Homo sapiens	ALB				R-HSA-481007
R-HSA-881907	Gastrin-CREB signalling pathway via PKC and MAPK	1	504	1	218	0.0386503	0.802293	0.802293	4	68	0.00665427	9606	Homo sapiens	ANXA1	P04083	ANXA1	P00533	R-HSA-749448;R-HSA-749452;R-HSA-2179387;R-HSA-379048
R-HSA-71291	Metabolism of amino acids and derivatives	1	635	0	77	0.0486963	0.809752	0.809752	1	247	0.0241707	9606	Homo sapiens	DARS				R-HSA-2408546
R-HSA-4420097	VEGFA-VEGFR2 Pathway	0	372	1	391	0.0285276	0.811573	0.811573	3	115	0.0112535	9606	Homo sapiens			FKBP4	P07900;P04792	R-HSA-202129;R-HSA-5218916;R-HSA-5218643
R-HSA-194315	Signaling by Rho GTPases	1	438	0	324	0.033589	0.817815	0.817815	1	108	0.0105685	9606	Homo sapiens	YWHAE				R-HSA-75016
R-HSA-194138	Signaling by VEGF	0	381	1	407	0.0292178	0.819561	0.819561	3	121	0.0118407	9606	Homo sapiens			FKBP4	P07900;P04792	R-HSA-202129;R-HSA-5218916;R-HSA-5218643
R-HSA-5653656	Vesicle-mediated transport	2	819	0	619	0.0628067	0.819893	0.819893	5	250	0.0244642	9606	Homo sapiens	YWHAE;ALB				R-HSA-8933452;R-HSA-2168887;R-HSA-1454689;R-HSA-8877612;R-HSA-1445149
R-HSA-74160	Gene Expression	8	2124	6	2831	0.162883	0.820143	0.820143	32	782	0.0765241	9606	Homo sapiens	YWHAE;EEF1G;DARS;HNRNPK;HNRNPH1;HSPA1A	P52597;P26641;P0DMV8;P31943;P55795;P14868;P61978;P62258	EEF1G;HNRNPK;ANXA1;ANXA2;LMNA;FKBP4	P04637;P00533;P01106;P29692;P24534;P84103;P40692;P04792;P38159;P63104	R-HSA-379974;R-HSA-72130;R-HSA-5632732;R-HSA-72139;R-HSA-379982;R-HSA-72143;R-HSA-379861;R-HSA-450580;R-HSA-1484099;R-HSA-75096;R-HSA-379993;R-HSA-379865;R-HSA-379867;R-HSA-379994;R-HSA-6806392;R-HSA-72160;R-HSA-72103;R-HSA-72107;R-HSA-8874797;R-HSA-156910;R-HSA-380008;R-HSA-379893;R-HSA-450551;R-HSA-156913;R-HSA-8865265;R-HSA-156661;R-HSA-5632738;R-HSA-450620;R-HSA-6804188;R-HSA-72124;R-HSA-6804…
R-HSA-8864260	Transcriptional regulation by the AP-2 (TFAP2) family of transcription factors	0	52	2	722	0.00398773	0.832954	0.832954	2	44	0.00430571	9606	Homo sapiens			ANXA1;LMNA	P00533;P01106	R-HSA-8865265;R-HSA-8874797
R-HSA-162906	HIV Infection	0	253	1	549	0.0194018	0.833759	0.833759	1	155	0.0151678	9606	Homo sapiens			HNRNPK	Q92608	R-HSA-200952
R-HSA-392499	Metabolism of proteins	6	1857	2	1903	0.142408	0.835028	0.835028	20	670	0.0655641	9606	Homo sapiens	EEF1G;HNRNPK;LMNA;TCP1;CCT8	P50990;P26641;P17987;ENSG00000160789;P02545;P61978	EEF1G;HNRNPK	P04637;P29692;P24534	R-HSA-6814119;R-HSA-8850534;R-HSA-390470;R-HSA-1791128;R-HSA-8850529;R-HSA-4570499;R-HSA-391266;R-HSA-389954;R-HSA-2997706;R-HSA-6814124;R-HSA-389961;R-HSA-8850539;R-HSA-156910;R-HSA-6814121;R-HSA-6814120;R-HSA-390453;R-HSA-156913;R-HSA-389970;R-HSA-8850527;R-HSA-390459
R-HSA-5633007	Regulation of TP53 Activity	0	177	1	674	0.0135736	0.854804	0.854804	2	98	0.00958998	9606	Homo sapiens			HNRNPK	P04637	R-HSA-6804188;R-HSA-6804762
R-HSA-1643685	Disease	5	1487	5	1820	0.114034	0.858976	0.858976	19	896	0.0876798	9606	Homo sapiens	YWHAE;LMNA;ALB;HSPA1A	P0DMV8;P02545-1;P02768;P02545;P62258	HNRNPK;ANXA1;DNAJA3;LMNA;FKBP4	P07900;Q92608;Q9Y6K9;P08581;P00533;P36507;P01106	R-HSA-5228840;R-HSA-192746;R-HSA-6802927;R-HSA-8875371;R-HSA-1247999;R-HSA-6802935;R-HSA-6802934;R-HSA-6802933;R-HSA-5211356;R-HSA-6802932;R-HSA-5336420;R-HSA-1248677;R-HSA-5661184;R-HSA-2220985;R-HSA-5661198;R-HSA-200952;R-HSA-192830;R-HSA-8863674;R-HSA-8868344
R-HSA-168249	Innate Immune System	4	1528	1	1386	0.117178	0.880163	0.880163	8	702	0.0686956	9606	Homo sapiens	ANXA2;CCT8;HSPA1A	P50990;P0DMV8;P0DMV9;P07355	ANXA1	Q13546;Q9Y6K9	R-HSA-1810457;R-HSA-168934;R-HSA-5609665;R-HSA-6800434;R-HSA-622415;R-HSA-6798751;R-HSA-6798748;R-HSA-168921
R-HSA-201681	TCF dependent signaling in response to WNT	0	215	1	781	0.0164877	0.891798	0.891798	2	71	0.00694784	9606	Homo sapiens			LMNA	P01106;P63104	R-HSA-3769393;R-HSA-4411357
R-HSA-177929	Signaling by EGFR	0	402	1	637	0.0308282	0.896702	0.896702	1	139	0.0136021	9606	Homo sapiens			ANXA1	P00533	R-HSA-177942
R-HSA-5663202	Diseases of signal transduction	1	463	2	652	0.0355061	0.912541	0.912541	8	297	0.0290635	9606	Homo sapiens	LMNA	P02545	ANXA1;LMNA	P00533;P01106	R-HSA-6802935;R-HSA-6802934;R-HSA-6802933;R-HSA-6802932;R-HSA-1248677;R-HSA-6802927;R-HSA-2220985;R-HSA-1247999
R-HSA-382551	Transmembrane transport of small molecules	1	890	0	180	0.0682515	0.919744	0.919744	3	320	0.0313142	9606	Homo sapiens	ALB				R-HSA-194130;R-HSA-194083;R-HSA-194079
R-HSA-109582	Hemostasis	2	796	0	1122	0.0610429	0.930737	0.930737	2	322	0.0315099	9606	Homo sapiens	ANXA2;ALB				R-HSA-481007;R-HSA-158750
R-HSA-199991	Membrane Trafficking	1	658	0	606	0.0504601	0.936189	0.936189	4	218	0.0213328	9606	Homo sapiens	YWHAE				R-HSA-8933452;R-HSA-1454689;R-HSA-8877612;R-HSA-1445149
R-HSA-1280215	Cytokine Signaling in Immune system	2	979	1	1069	0.0750767	0.938352	0.938352	2	413	0.0404149	9606	Homo sapiens	ANXA1	P04083;ENSG00000135046	LMNA	P63104	R-HSA-6785895;R-HSA-912757
R-HSA-388396	GPCR downstream signaling	1	1137	0	50	0.0871933	0.940166	0.940166	6	64	0.00626284	9606	Homo sapiens	ANXA1				R-HSA-749448;R-HSA-749454;R-HSA-749452;R-HSA-749456;R-HSA-380073;R-HSA-379048
R-HSA-166520	Signalling by NGF	1	521	0	767	0.039954	0.940314	0.940314	1	197	0.0192778	9606	Homo sapiens	YWHAE				R-HSA-204981
R-HSA-195721	Signaling by Wnt	0	329	1	956	0.0252301	0.94514	0.94514	2	156	0.0152657	9606	Homo sapiens			LMNA	P01106;P63104	R-HSA-3769393;R-HSA-4411357
R-HSA-5663205	Infectious disease	1	529	3	798	0.0405675	0.950209	0.950209	6	325	0.0318035	9606	Homo sapiens	HSPA1A	P0DMV8	HNRNPK;DNAJA3;FKBP4	P07900;Q92608;P08581;P36507	R-HSA-5211356;R-HSA-5336420;R-HSA-192746;R-HSA-200952;R-HSA-8875371;R-HSA-192830
R-HSA-168256	Immune System	6	2591	3	2225	0.198696	0.953442	0.953442	11	1284	0.125648	9606	Homo sapiens	ANXA1;ANXA2;CCT8;HSPA1A	P50990;P0DMV8;P0DMV9;P04083;ENSG00000135046;P07355	ANXA1;ANXA2;LMNA	Q13546;Q9Y6K9;P19320;P63104	R-HSA-6785895;R-HSA-1810457;R-HSA-168934;R-HSA-5609665;R-HSA-6800434;R-HSA-622415;R-HSA-6798751;R-HSA-912757;R-HSA-6798748;R-HSA-168921;R-HSA-198941
R-HSA-1430728	Metabolism	6	3519	2	897	0.269862	0.954066	0.954066	14	2145	0.209903	9606	Homo sapiens	DARS;ALB;BLVRB;ENO1;PGD	P06733;P02768;P52209;P14868;P30043;P09104	ANXA2;FKBP4	P07900;Q8NBP7	R-HSA-8855111;R-HSA-194083;R-HSA-71299;R-HSA-264679;R-HSA-2408546;R-HSA-189384;R-HSA-194153;R-HSA-194121;R-HSA-71660;R-HSA-194130;R-HSA-202129;R-HSA-6784734;R-HSA-194079;R-HSA-70494
R-HSA-3700989	Transcriptional Regulation by TP53	1	483	2	1021	0.0370399	0.965523	0.965523	5	256	0.0250514	9606	Homo sapiens	YWHAE	P62258	HNRNPK;ANXA2	P04637;P40692	R-HSA-5632738;R-HSA-5632732;R-HSA-6804188;R-HSA-6804762;R-HSA-6806392
R-HSA-422475	Axon guidance	1	598	1	933	0.0458589	0.966882	0.966882	8	286	0.0279871	9606	Homo sapiens	EZR	P15311	ANXA1	P00533	R-HSA-374677;R-HSA-374663;R-HSA-374662;R-HSA-443779;R-HSA-445089;R-HSA-445069;R-HSA-374680;R-HSA-374664
R-HSA-1280218	Adaptive Immune System	0	1076	1	850	0.0825153	0.986474	0.986474	1	271	0.0265192	9606	Homo sapiens			ANXA2	P19320	R-HSA-198941
R-HSA-372790	Signaling by GPCR	1	1504	1	488	0.115337	0.990941	0.990941	9	326	0.0319014	9606	Homo sapiens	ANXA1	P04083	ANXA1	P00533	R-HSA-749448;R-HSA-749454;R-HSA-749452;R-HSA-444476;R-HSA-2179387;R-HSA-749456;R-HSA-380073;R-HSA-391913;R-HSA-379048
R-HSA-556833	Metabolism of lipids and lipoproteins	1	1402	1	590	0.107515	0.991512	0.991512	8	898	0.0878755	9606	Homo sapiens	ALB	P02768	ANXA2	Q8NBP7	R-HSA-8855111;R-HSA-194130;R-HSA-194083;R-HSA-264679;R-HSA-6784734;R-HSA-194153;R-HSA-194121;R-HSA-194079
R-HSA-597592	Post-translational protein modification	1	1191	1	1299	0.0913344	0.996679	0.996679	2	390	0.0381642	9606	Homo sapiens	HNRNPK	P61978	HNRNPK	P04637	R-HSA-4570499;R-HSA-2997706
R-HSA-1266738	Developmental Biology	1	1159	1	1643	0.0888804	0.998332	0.998332	8	472	0.0461885	9606	Homo sapiens	EZR	P15311	ANXA1	P00533	R-HSA-374677;R-HSA-374663;R-HSA-374662;R-HSA-443779;R-HSA-445089;R-HSA-445069;R-HSA-374680;R-HSA-374664
R-HSA-212436	Generic Transcription Pathway	1	1042	4	1890	0.079908	0.998896	0.998896	8	353	0.0345435	9606	Homo sapiens	YWHAE	P62258	HNRNPK;ANXA1;ANXA2;LMNA	P04637;P00533;P01106;P40692	R-HSA-1484099;R-HSA-8865265;R-HSA-5632738;R-HSA-5632732;R-HSA-8874797;R-HSA-6804188;R-HSA-6804762;R-HSA-6806392
R-HSA-162582	Signal Transduction	4	2905	5	3396	0.222776	0.99983	0.99983	36	1836	0.179665	9606	Homo sapiens	YWHAE;ANXA1;HNRNPH1	P52597;P31943;P04083;P62258	ANXA1;HNRNPK;DNAJA3;LMNA;FKBP4	P07900;Q13546;Q5VWX1;P08581;P00533;P36507;P01106;Q13043;O75525;P04792;P63104	R-HSA-749448;R-HSA-749454;R-HSA-5687121;R-HSA-749452;R-HSA-3769393;R-HSA-83656;R-HSA-75016;R-HSA-2028692;R-HSA-6800298;R-HSA-8849032;R-HSA-202129;R-HSA-177942;R-HSA-8849042;R-HSA-1484099;R-HSA-5357828;R-HSA-6803838;R-HSA-2179387;R-HSA-6803836;R-HSA-749456;R-HSA-5218643;R-HSA-4411357;R-HSA-5687113;R-HSA-6803527;R-HSA-109858;R-HSA-8875374;R-HSA-109864;R-HSA-5218916;R-HSA-380073;R-HSA-391913;R-HSA-3…
